# Supplementary figures and images for: Cellulose crystallinity index: measurement techniques and their impact on interpreting cellulase performance
Source: Springer Nature journal article supplement (doi:10.1186/1754-6834-3-10), 2010-05-24

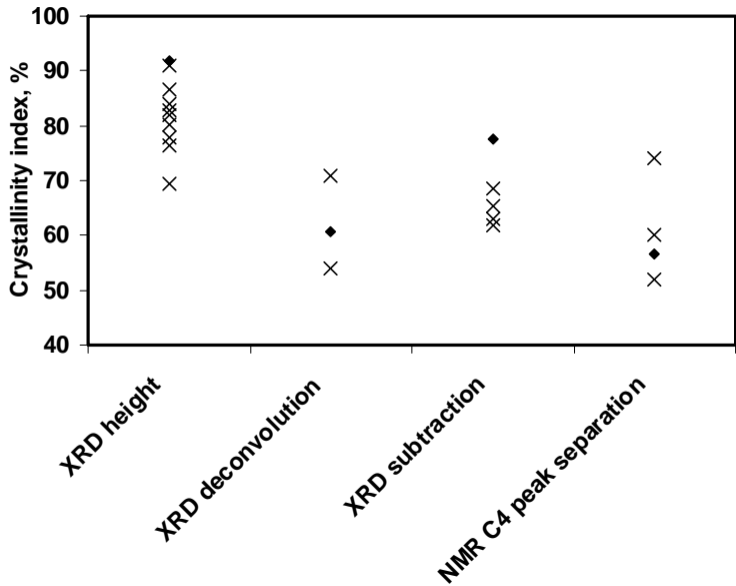

Supplement: 13068_2009_59_MOESM4_ESM.pdf [file 13068_2009_59_MOESM4_ESM.pdf]
